# Supplementary material
Source: PubMed Central journal article supplement (PMC5859995)
Supplement: btw814_supp.pdf [file btw814_supp.pdf]

## **Primerize-2D: automated primer design for RNA multidimensional chemical mapping**

Siqi Tian<sup>1</sup>, Rhiju Das<sup>1,2,\*</sup>

<sup>1</sup> Department of Biochemistry, <sup>2</sup> Department of Physics, Stanford University, Stanford CA 94305, USA

\* Corresponding author. E-mail: [rhiju@stanford.edu](mailto:rhiju@stanford.edu) Phone: (650) 723 5976

### **SUPPLEMENTAL MATERIAL**

#### **Supplementary Figure S1. Schematics for Primerize-2D enabled application of multidimensional chemical mapping methods.**

(A). Mutate-and-map ( $M^2$ ) provides rich base-pairing information by assessing which nucleotides are ‘released’ upon making single mutations at every other nucleotide.

(B). Mutation-map-rescue ( $M^2R$ ) validates or falsifies base pairs by detecting rescue of the RNA structure by predicted compensatory mutations.

#### **Supplementary Figure S2. Primerize-2D workflow and example input and output interface.**

(A). Primerize-2D automates design of primer plates for mutate-and-map that involves synthesis of comprehensive single mutant library for multidimensional chemical mapping.

(B). Input interface of Primerize-2D server  $M^2R$  sets. Primerize takes a sense-strand DNA template sequence, and at least one secondary structure as input. Specific set of primers to use, as well as advanced options are available for customization.

(C). Output interface of Primerize-2D server  $M^2R$  sets. Primerize returns an illustration with sequence regions and targeted base pairs highlighted; graphic representation of construct primers in 96-well plate layout; and the general scheme of how primers assemble into the template. All results are assigned with a unique JOB\_ID and are available for download.

(A)

Mutate-and-Map ( $M^2$ )

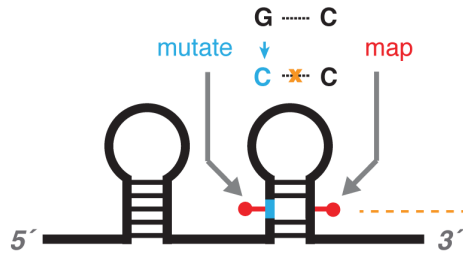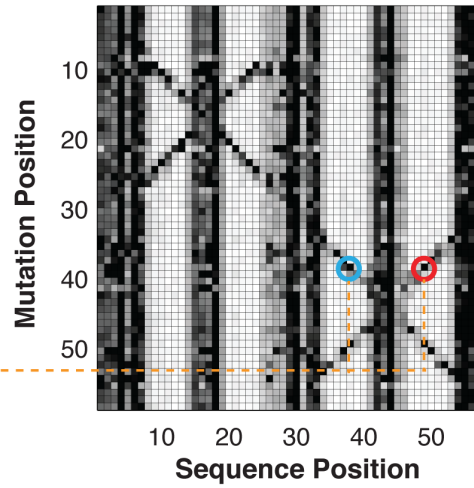

(B)

Mutate-Map-Rescue ( $M^2R$ )

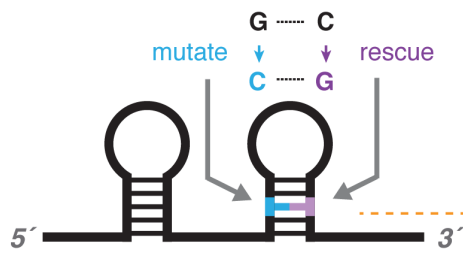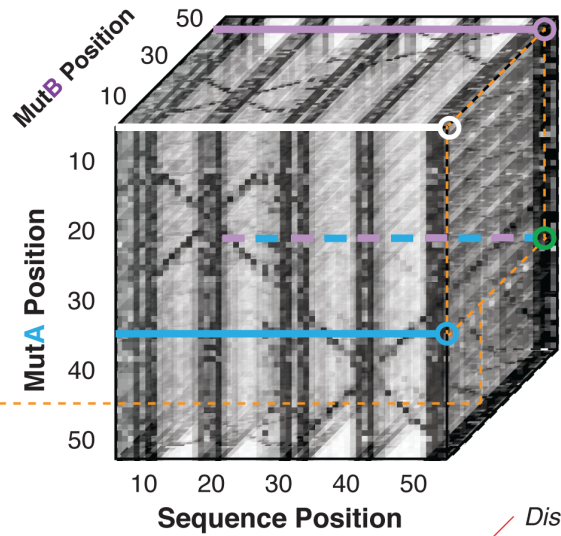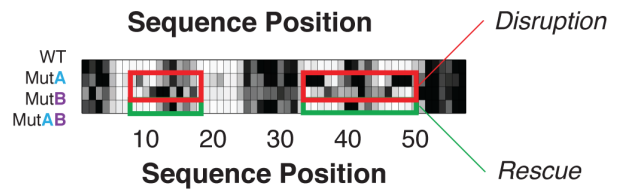

### (A)

### (C)

RNA Sequence → Mutant Library → MCM Data → 2nd Structure Model

Primerize-2D

PCR Assembly  
MCM Experiment

Data Quantitation  
RNA Structure Prediction

Output Result:

Save Result

RNA Sequence

```

GGGAAACUGCCUGA
UGGAGGGGAUAC
UACUGGAARCGUA
GCUAAUACCGCAUA
ACUCCGACAGACCA
AAGAGGGGACCUU
CGGCCUCUUGCCA
UCGGAUGUGCCC
  
```

Mutant Library

MCM Data

2nd Structure Model

INFO: DIFF Mode (11:20)

52 102

```

TTCTATACGACTCATATAGCCCAAGGCGUAGUAGCCCAACGAAUUGCGGAAAGGGGUCACAGCCGUACG
UACCAAGUCUAGGGGAACUUGAAGUCCUUGCAAGUUGUUAUAGCUGAGCGAAGUUGUUAUAGCUGAAG
AAGUCUUAAGCACAGAUUCUUGUAGUAGUAGUUAUAGCUGAAGUUAUAGCUGAAGUUAUAGCUGAAG
CAACACACAC
  
```

Time elapsed: 1.2 s.

SUCCESS: All plates are ready to go. No editing is needed before placing the order.

### (B)

### Mutation/Rescue Sets

Name Tag: P1Pb\_2HPP optional

Sequence: nt

sequence offset: -51

mutation starting position: nt @ 102

mutation ending position: nt @ 281

mutation library choice: nt

Swap (A-U>U-A, G-C>C-G)

# number of mutations for each:

Single Mutation

include 'single mutants'

Fill WT primers

Advanced Options

Primer 1: TTCTATACGACTCATATAGCCCAAGGCGUAGUAGCCCAACGAAUUGCGGAAAGGGGUCACAGCCGUACG

Primer 2: UACCAAGUCUAGGGGAACUUGAAGUCCUUGCAAGUUGUUAUAGCUGAAGCGAAGUUGUUAUAGCUGAAG

Primer 3: AAGUCUUAAGCACAGAUUCUUGUAGUAGUAGUUAUAGCUGAAGUUAUAGCUGAAGUUAUAGCUGAAG

Primer 4: CAACACACAC

Primer 5: TTCTATACGACTCATATAGCCCAAGGCGUAGUAGCCCAACGAAUUGCGGAAAGGGGUCACAGCCGUACG

Primer 6: UACCAAGUCUAGGGGAACUUGAAGUCCUUGCAAGUUGUUAUAGCUGAAGCGAAGUUGUUAUAGCUGAAG

Primer 7: AAGUCUUAAGCACAGAUUCUUGUAGUAGUAGUUAUAGCUGAAGUUAUAGCUGAAGUUAUAGCUGAAG

Primer 8: CAACACACAC

Assembly Scheme

Primerize!

Add Structure

Add Primers

Show Demo 1

Show Demo 2

Clear Form

Primer 1: TTCTATACGACTCATATAGCCCAAGGCGUAGUAGCCCAACGAAUUGCGGAAAGGGGUCACAGCCGUACG Length: 259 nt

Primer 2: UACCAAGUCUAGGGGAACUUGAAGUCCUUGCAAGUUGUUAUAGCUGAAGCGAAGUUGUUAUAGCUGAAG Length: 259 nt

Primer 3: AAGUCUUAAGCACAGAUUCUUGUAGUAGUAGUUAUAGCUGAAGUUAUAGCUGAAGUUAUAGCUGAAG Length: 259 nt

Primer 4: CAACACACAC Length: 259 nt

Primer 5: TTCTATACGACTCATATAGCCCAAGGCGUAGUAGCCCAACGAAUUGCGGAAAGGGGUCACAGCCGUACG Length: 259 nt

Primer 6: UACCAAGUCUAGGGGAACUUGAAGUCCUUGCAAGUUGUUAUAGCUGAAGCGAAGUUGUUAUAGCUGAAG Length: 259 nt

Primer 7: AAGUCUUAAGCACAGAUUCUUGUAGUAGUAGUUAUAGCUGAAGUUAUAGCUGAAGUUAUAGCUGAAG Length: 259 nt

Primer 8: CAACACACAC Length: 259 nt

What's next? Try our suggested experimental protocol for PCR assembly.
